# Supplementary material for: Elevated serum levels of bone sialoprotein during ICU treatment predict long-term mortality in critically ill patients
Source: PubMed Central journal article supplement (PMC6021423; doi:10.1038/s41598-018-28201-7), 2018-06-27
Supplement: 41598_2018_28201_MOESM1_ESM.pdf [file 41598_2018_28201_MOESM1_ESM.pdf]

**Elevated serum levels of bone sialoprotein during ICU treatment  
predict long-term mortality in critically ill patients**

Mark Luedde<sup>1,\*</sup>, Sanchari Roy<sup>2,\*</sup>, Hans-Joerg Hippe<sup>1,\*</sup>, David Vargas Cardenas<sup>1</sup>, Martina Spehlmann<sup>1</sup>, Mihael Vucur<sup>2</sup>, Pia Hoening<sup>2</sup>, Sven Loosen<sup>2</sup>, Norbert Frey<sup>1</sup>, Christian Trautwein<sup>2</sup>, Tom Luedde<sup>2</sup>, Alexander Koch<sup>2,†</sup>, Frank Tacke<sup>2,†</sup>, Christoph Roderburg<sup>2,†</sup>

Content of the Supplementary information: Supplementary figure 1

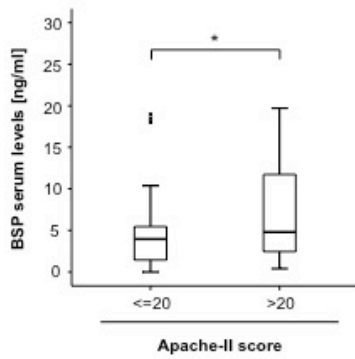

**Supplementary Figure 1:** BSP concentrations at admission to the ICU were further elevated in patients with more severe disease state according to initial APACHE-II scores (cut-offs are given in the figure).
